# Supplementary material for: The diagnostic utility of serum IgG4 concentrations in IgG4-related disease
Source: HighWire-hosted journal article supplement (doi:10.1136/annrheumdis-2013-204907), 2014-03-21
Supplement: annrheumdis-2013-204907supp.pdf [file annrheumdis-2013-204907supp.pdf]

Table S1: Organ Involvement in Definite and Probable IgG4-RD

| Definite IgG4-RD |                                                                                                             | Probable IgG4-RD |                                                                         |
|------------------|-------------------------------------------------------------------------------------------------------------|------------------|-------------------------------------------------------------------------|
| Patient          | Organ Involvement                                                                                           | Patient          | Organ Involvement                                                       |
| 1                | Autoimmune Pancreatitis                                                                                     | 28               | Autoimmune pancreatitis                                                 |
| 2                | Cervical LAD                                                                                                | 29               | Autoimmune pancreatitis                                                 |
| 3                | Sinusitis, lung pseudotumor, intrathoracic and intraabdominal LAD, lacrimal glands and paravertebral masses | 30               | Autoimmune pancreatitis                                                 |
| 4                | Aorta, pancreas, liver and salivary glands and LAD                                                          | 31               | Autoimmune pancreatitis & intraperitoneal LAD                           |
| 5                | Pericarditis                                                                                                | 32               | Autoimmune pancreatitis                                                 |
| 6                | Cervical lymphadenopathy & ILD                                                                              | 33               | Interstitial lung disease & intrathoracic LAD                           |
| 7                | Aorta & intrathoracic LAD                                                                                   | 34               | Autoimmune hepatitis                                                    |
| 8                | Autoimmune pancreatitis                                                                                     | 35               | Autoimmune pancreatitis, retroperitoneal fibrosis & intraperitoneal LAD |
| 9                | AIP, sclerosing cholangitis and RPF                                                                         | 36               | Autoimmune pancreatitis                                                 |
| 10               | RPF & intra-abdominal LAD                                                                                   | 37               | Autoimmune pancreatitis                                                 |
| 11               | Parotitis, orbital pseudotumor and LAD                                                                      | 38               | Autoimmune pancreatitis                                                 |
| 12               | AIP, intrathoracic and abdominal LAD and pulmonary nodules                                                  | 39               | Membranous nephropathy                                                  |
| 13               | AIP & sclerosing cholangitis                                                                                | 40               | Sclerosing cholangitis                                                  |
| 14               | Parotitis, orbital pseudotumor and LAD                                                                      | 41               | Autoimmune pancreatitis                                                 |
| 15               | AIP, parotitis and orbital pseudotumor                                                                      | 42               | Sclerosing cholangitis & pericarditis                                   |
| 16               | AIP, sclerosing cholangitis and parotitis                                                                   | 43               | Sclerosing cholangitis                                                  |
| 17               | Retroperitoneal fibrosis                                                                                    | 44               | Autoimmune pancreatitis                                                 |
| 18               | Liver pseudotumor                                                                                           | 45               | Autoimmune pancreatitis                                                 |
| 19               | Thoracic aneurysmal aortitis                                                                                | 46               | Autoimmune pancreatitis                                                 |
| 20               | Autoimmune pancreatitis                                                                                     | 47               | Sclerosing cholangitis                                                  |
| 21               | AIP & sclerosing cholangitis                                                                                | 48               | Autoimmune pancreatitis & intraperitoneal LAD                           |
| 22               | Bilateral orbital pseudotumor                                                                               | 49               | Sclerosing cholangitis                                                  |
| 23               | Autoimmune pancreatitis                                                                                     | 50               | Autoimmune pancreatitis                                                 |
| 24               | Autoimmune pancreatitis                                                                                     | 51               | Autoimmune pancreatitis                                                 |
| 25               | Tonsillitis                                                                                                 | 52               | Autoimmune pancreatitis                                                 |
| 26               | Mastoiditis                                                                                                 | 53               | Sclerosing cholangitis                                                  |
| 27               | Autoimmune pancreatitis, lung pseudotumor, tubulointerstitial nephritis and LAD                             | 54               | Autoimmune pancreatitis                                                 |
|                  |                                                                                                             | 55               | Autoimmune pancreatitis                                                 |
|                  |                                                                                                             | 56               | AIP & intraperitoneal LAD                                               |
|                  |                                                                                                             | 57               | Sclerosing cholangitis & intraabdominal LAD                             |
|                  |                                                                                                             | 58               | Autoimmune pancreatitis                                                 |

|  |  |    |                                      |
|--|--|----|--------------------------------------|
|  |  | 59 | AIP & sclerosing cholangitis         |
|  |  | 60 | Autoimmune pancreatitis              |
|  |  | 61 | Chronic sinusitis & cirrhosis        |
|  |  | 62 | Autoimmune pancreatitis              |
|  |  | 63 | Retroperitoneal fibrosis             |
|  |  | 64 | AIP, sialadenitis & lung pseudotumor |
|  |  | 65 | Sclerosing cholangitis               |

Table S1: Organ Involvement in Definite & Probable IgG4-RD

Key: AIP is autoimmune pancreatitis; LAD is lymphadenopathy; RPF is retroperitoneal fibrosis
